# Supplementary material
Source: Frontiers journal article supplement (https://www.frontiersin.org/articles/473733)
Supplement: Data_Sheet_1.pdf [file Data_Sheet_1.pdf]

**Table 1****IMWG criteria of response for patients with MM**

| <b>Response SubCategory</b>          | <b>Response Criteria</b>                                                                                                                                                                                                                                                                                                                              |
|--------------------------------------|-------------------------------------------------------------------------------------------------------------------------------------------------------------------------------------------------------------------------------------------------------------------------------------------------------------------------------------------------------|
| <b>sustained MRD-negative</b>        | MRD negativity in the marrow (NGF or NGS, or both) and by imaging as defined below, confirmed minimum of 1 year apart. Subsequent evaluations can be used to further specify the duration of negativity (eg, MRD-negative at 5 years)                                                                                                                 |
| <b>Flow MRD-negative</b>             | Absence of phenotypically aberrant clonal plasma cells by NGF on bone marrow aspirates using the EuroFlow standard operation procedure for MRD detection in multiple myeloma (or validated equivalent method) with a minimum sensitivity of 1 in 10 <sup>5</sup> nucleated cells or higher                                                            |
| <b>Sequencing MRD-negative</b>       | Absence of clonal plasma cells by NGS on bone marrow aspirate in which presence of a clone is defined as less than two identical sequencing reads obtained after DNA sequencing of bone marrow aspirates using the LymphoSIGHT platform (or validated equivalent method) with a minimum sensitivity of 1 in 10 <sup>5</sup> nucleated cells or higher |
| <b>Imaging positive MRD-negative</b> | MRD negativity as defined by NGF or NGS plus disappearance of every area of increased tracer uptake found at baseline or a preceding PET/CT or decrease to less mediastinal blood pool SUV or decrease to less than that of surrounding normal tissue                                                                                                 |

**Table 2** Comparison between different techniques to detect MRD in MM-BM

| Multidimensional flow cytometry (phenotype detection) |                                 |                                          |                                        |                                          |                                                                                         | Molecular techniques (genotype detection)               |                                                          |
|-------------------------------------------------------|---------------------------------|------------------------------------------|----------------------------------------|------------------------------------------|-----------------------------------------------------------------------------------------|---------------------------------------------------------|----------------------------------------------------------|
| Number of cells required                              | First generation                | Second generation and third generation   |                                        |                                          |                                                                                         | Second generation                                       | Third generation                                         |
|                                                       | 2008 EMN consensus (4-6 colors) | Euroflow (6 colors)                      | 2016 ICCS consensus (8 or more colors) | DURAClone RE PC (9 colors)               | MKSSC32 (10 colors)                                                                     | ASO-qRT-PCR                                             | Next generation sequencing                               |
|                                                       |                                 | 20 × 10 <sup>6</sup> leukocytes          | 2-5 × 10 <sup>6</sup> leukocytes       | 5 × 10 <sup>6</sup> leukocytes           | 20 × 10 <sup>6</sup> leukocytes                                                         | 500 ng, 1 × 10 <sup>6</sup> PCs for triplicate analysis | 1400 ng, 2 × 10 <sup>6</sup> PCs for triplicate analysis |
| Theoretical LOD/LOQ                                   | 0.004                           | 4 × 10 <sup>6</sup> /1 × 10 <sup>5</sup> | 0.0004                                 | 8 × 10 <sup>6</sup> /2 × 10 <sup>5</sup> | 2 × 10 <sup>6</sup> /5 × 10 <sup>6</sup> (10 × 10 <sup>6</sup> cells staining capacity) | 0.0001                                                  | 0.00001                                                  |
| Applicability (% cases)                               | 95                              | 99                                       | 95                                     | 99                                       | 99                                                                                      | 50-90                                                   | 80-90                                                    |
| Pre-treatment evaluation ansample quality assurance   | Required                        | Not required                             | Not required                           | Not required                             | Not required                                                                            | Required                                                | Required                                                 |
| Required sample at diagnosis                          | No                              | No                                       | No                                     | No                                       | No                                                                                      | Yes                                                     | Yes                                                      |
| Required fresh sample                                 | Yes                             | Yes                                      | Yes                                    | Yes                                      | Yes                                                                                     | No                                                      | No                                                       |
| Turnaround                                            | 60-90 min                       | 60-90 min                                | 60-90 min                              | 60-90 min                                | 60-90 min                                                                               | Days                                                    | Days                                                     |
| Cost                                                  | +                               | ++                                       | ++                                     | ++                                       | ++                                                                                      | +                                                       | ++++                                                     |
| Availability                                          | Widely available                | Specialised labs                         |                                        |                                          |                                                                                         | Intermediate                                            | Specialised labs                                         |
| Harmonization                                         | Yes (EMN)                       | Yes (EMN)                                | Yes (ICCS/ESCCA)                       |                                          | ongoing                                                                                 | Yes                                                     | ongoing (EuroMRD)                                        |

**Supplementary Table 1**  
**Impact of MFC/MRD status on cytogenetic risk**

| Study                           | Method, LOD                             | Outcome in MRD <sup>+</sup> patients |                                   |                              |                                  |
|---------------------------------|-----------------------------------------|--------------------------------------|-----------------------------------|------------------------------|----------------------------------|
|                                 |                                         | PFS in high-risk cytogenetics        | PFS in standard-risk cytogenetics | OS in high-risk cytogenetics | OS in standard-risk cytogenetics |
| Hu, 2019 <sup>60</sup>          | MFC, 10 <sup>-4</sup>                   | mPFS 19 mo                           | mPFS 24 mo                        | not reported                 | not reported                     |
| Li, 2019 <sup>14</sup>          | MFC, 10 <sup>-4</sup>                   | mPFS 22 mo                           | mPFS 34 mo                        | 4-yrs OS 54%                 | 4-yrs OS 84%                     |
| Chakraborty, 2017 <sup>59</sup> | MFC, 10 <sup>-4</sup> -10 <sup>-5</sup> | mPFS 22 mo (in del17p pts)           | not reported                      | mOS 50 mo (in del17p pts)    | not reported                     |
| Paiva, 2012 <sup>107</sup>      | MFC, 10 <sup>-4</sup> -10 <sup>-5</sup> | 3-yrs TTP 0%                         | 3-yrs TTP 32%                     | 3-yrs OS 57%                 | 3-yrs OS 90%                     |
| Rawstron, 2013 <sup>58</sup>    | MFC, 10 <sup>-4</sup>                   | mPFS 8.7 mo                          | mPFS 33.7 mo                      | not reported                 | not reported                     |
| Liu, 2012 <sup>115</sup>        | MFC, 10 <sup>-5</sup>                   | mPFS 13.2 mo                         | mPFS 22.6 mo                      | mOS 22.7 mo                  | mOS 18.2 mo                      |
| Paiva, 2016 <sup>26</sup>       | MFC, 10 <sup>-5</sup>                   | mTTP 12 mo                           | mTTP 15 mo                        | median OS not reached        | median OS not reached            |

Abbreviations: MFC: multiparametric flow cytometry; mPFS: median progression free survival; mOS: median overall survival; mTTP: median time to progression; mo: months.
